# Supplementary material for: A Comprehensive Review of Immunotherapy Clinical Trials for Metastatic Urothelial Carcinoma: Immune Checkpoint Inhibitors Alone or in Combination, Novel Antibodies, Cellular Therapies, and Vaccines
Source: MDPI journal article supplement (doi:10.3390/cancers16020335), 2024-01-12
Supplement: s1 [file s1]

### Supplemental Materials

| <b>Supplemental Table S1. Clinical trials of bispecific antibodies for advanced solid tumors including metastatic urothelial carcinoma.</b> |                                                  |                                                   |              |              |                            |                   |            |
|---------------------------------------------------------------------------------------------------------------------------------------------|--------------------------------------------------|---------------------------------------------------|--------------|--------------|----------------------------|-------------------|------------|
| <b>Regimen</b>                                                                                                                              | <b>Drug Classes</b>                              | <b>Disease/Patients</b>                           | <b>Trial</b> | <b>Phase</b> | <b>Status (March 2023)</b> | <b>Identifier</b> | <b>ORR</b> |
| RO7247669 +/- tiragolumab vs atezolizumab                                                                                                   | PD-1 x LAG-3 BsAb + anti-TIGIT vs anti-PDL1      | 1L platinum-ineligible mUC                        |              | 2            | Recruiting                 | NCT05645692       |            |
| Bintrafusp alfa + NHS-IL12 +/- SBRT                                                                                                         | TGFβ x PDL1 BsAb + immuno-cytokine +/- radiation | Metastatic non-prostate GU cancers including mUC  |              | 1            | Recruiting                 | NCT04235777       |            |
| RO7121661                                                                                                                                   | PD-1 x TIM-3 BsAb                                | Advanced solid tumors                             |              | 1            | Active, not recruiting     | NCT03708328       |            |
| LB1410                                                                                                                                      | PD-1 x TIM-3 BsAb                                | Advanced solid tumors, lymphoma                   | Keyplus-001  | 1            | Recruiting                 | NCT05357651       |            |
| EMB-02                                                                                                                                      | PD-1 x LAG-3 BsAb                                | Advance solid tumors                              |              | 1/2          | Recruiting                 | NCT04618393       | 6.4% [1]   |
| AK129                                                                                                                                       | PD-1 x LAG-3 BsAb                                | Advanced solid tumors                             |              | 1            | Recruiting                 | NCT05645276       |            |
| INCA32459                                                                                                                                   | PD-1 x LAG-3 BsAb                                | Advanced solid tumors, melanoma, HNSCC            |              | 1            | Recruiting                 | NCT05577182       |            |
| AK112                                                                                                                                       | PD-1 x VEGF BsAb                                 | Advanced solid tumors                             |              | 1            | Recruiting                 | NCT04047290       | 23.5% [2]  |
| AK112                                                                                                                                       | PD-1 x VEGF BsAb                                 | Advanced solid tumors                             |              | 1/2          | Active, not recruiting     | NCT04597541       |            |
| AK112 + AK117                                                                                                                               | PD-1 x VEGF BsAb + anti-CD47                     | Advanced solid tumors w HNSCC dose expansion      |              | 1b/2         | Recruiting                 | NCT05229497       |            |
| AK112 + AK117 +/- chemo                                                                                                                     | PD-1 x VEGF BsAb + anti-CD47 +/- chemo           | Advanced solid tumors w HNSCC dose expansion      |              | 1b/2         | Recruiting                 | NCT05214482       |            |
| XmAb@20717                                                                                                                                  | PD-1 x CTLA-4 BsAb                               | Advanced solid tumors                             | DUET-2       | 1            | Completed                  | NCT03517488       | 13.0% [3]  |
| AK104                                                                                                                                       | PD-1 x CTLA-4 BsAb                               | Advanced solid tumors                             |              | 1/2          | Completed                  | NCT04172454       |            |
| AK104 + AK117                                                                                                                               | PD-1 x CTLA-4 BsAb + anti-CD47                   | Advanced solid tumors w esophageal dose expansion |              | 1/2          | Recruiting                 | NCT05235542       |            |
| AK104 + AK119                                                                                                                               | PD-1 x CTLA-4 BsAb + anti-CD73                   | Advanced solid tumors                             |              | 1/2          | Recruiting                 | NCT05559541       |            |
| KN046 + MAX-40279                                                                                                                           | PD-L1 x CTLA-4 BsAb + multi-TKI                  | Advanced solid tumors                             |              | 1/2          | Not yet recruiting         | NCT05425602       |            |
| B1962                                                                                                                                       | PD-L1 x VEGF BsAb                                | Advanced solid tumors                             |              | 1            | Not yet recruiting         | NCT05650385       |            |

|                                 |                                              |                                                                |        |     |                           |                             |              |
|---------------------------------|----------------------------------------------|----------------------------------------------------------------|--------|-----|---------------------------|-----------------------------|--------------|
| Y101D                           | PD-L1 x<br>TGF- $\beta$ BsAb                 | Advanced solid<br>tumors                                       |        | 1   | Unknown                   | NCT05028556                 |              |
| QLS31901                        | PD-L1 x<br>TGF- $\beta$                      | Advanced solid<br>tumors                                       |        | 1   | Unknown                   | NCT04954456                 |              |
| TST005                          | PD-L1 x<br>TGF- $\beta$                      | Advanced solid<br>tumors                                       |        | 1   | Terminated                | NCT04958434                 | 0 % [4]      |
| ABL501                          | PD-L1 x<br>LAG-3 BsAb                        | Advanced solid<br>tumors                                       |        | 1   | Recruiting                | NCT05101109                 |              |
| FS118                           | PDL1 x<br>LAG-3 BsAb                         | Advanced solid<br>tumors                                       |        | 1/2 | Active, not<br>recruiting | NCT03440437                 | 2.3%<br>[5]  |
| HLX301                          | PDL1 x<br>TIGIT BsAb                         | Advanced solid<br>tumors, lymphoma                             |        | 1/2 | Recruiting                | NCT05390528                 |              |
| HLX301                          | PDL1 x<br>TIGIT BsAb                         | Advanced solid<br>tumors w a mUC<br>dose expansion<br>cohort D |        | 1/2 | Recruiting                | NCT05102214                 |              |
| SI-B003                         | PD-1 x<br>CTLA4 BsAb                         | Advanced solid<br>tumors                                       |        | 1   | Recruiting                | NCT04606472                 | 16.1%<br>[6] |
| XmAb@22841 +/-<br>pembrolizumab | LAG3 x<br>CTLA4 BsAb<br>+/- anti-PD1         | Advanced solid<br>tumors                                       | DUET-4 | 1   | Completed                 | NCT03849469                 |              |
| XmAb@23104 +/-<br>ipilimumab    | ICOS x PD1<br>BsAb +/-<br>anti-CTLA4         | Advanced solid<br>tumors                                       | DUET-3 | 1   | Recruiting                | NCT03752398                 | 4.8%<br>[7]  |
| CDX-527                         | PD-L1 x<br>CD27 BsAb                         | Advanced solid<br>tumors                                       |        | 1   | Completed                 | NCT04440943                 | [8]          |
| IBI322                          | PD-L1 x<br>CD47 BsAb                         | Advanced solid<br>tumors, lymphoma                             |        | 1   | Completed                 | NCT04338659                 |              |
| IBI322                          | PD-L1 x<br>CD47 BsAb                         | Advanced solid<br>tumors                                       |        | 1   | Completed                 | NCT04912466<br>NCT04328831  | 20%<br>[9]   |
| IMM2520                         | PD-L1 x<br>CD47 BsAb                         | Advanced solid<br>tumors                                       |        | 1   | Recruiting                | NCT05780307                 |              |
| BAT7104                         | PD-L1 x<br>CD47 BsAb                         | Advanced solid<br>tumors                                       |        | 1   | Recruiting                | NCT05767060,<br>NCT05200013 |              |
| HX009                           | PD-1 x<br>CD47 BsAb                          | Advanced solid<br>tumors                                       |        | 2   | Active, not<br>recruiting | NCT04886271                 |              |
| HX009                           | PD-1 x<br>CD47 BsAb                          | Advanced solid<br>tumors                                       |        | 1   | Active, not<br>recruiting | NCT05731752                 |              |
| XmAb@808 +/-<br>pembrolizumab   | B7-H3 x<br>CD28 BsAb<br>+/- anti-PD1         | Advanced solid<br>tumors                                       |        | 1   | Recruiting                | NCT05585034                 |              |
| INBRX-105 +/-<br>pembrolizumab  | PDL1 x<br>CD137 BsAb<br>+/- anti-PD1         | Advanced solid<br>tumors                                       |        | 1   | Recruiting                | NCT03809624                 |              |
| ABL503                          | PDL1 x<br>CD137                              | Advanced solid<br>tumors                                       |        | 1   | Recruiting                | NCT04762641                 |              |
| PRS-344                         | PD-L1 x<br>CD137 BsAb<br>anticalin<br>fusion | Advanced solid<br>tumors                                       |        | 1/2 | Recruiting                | NCT05159388                 |              |
| MCLA-145                        | PDL1 x<br>CD137 BsAb                         | Advanced solid<br>tumors                                       |        | 1   | Recruiting                | NCT03922204                 |              |
| FS222                           | PDL1 x<br>CD137 BsAb                         | Advanced solid<br>tumors                                       |        | 1   | Recruiting                | NCT04740424                 |              |
| FS120 +/-<br>pembrolizumab      | OX40 x<br>CD137 BsAb<br>+/- anti-PD1         | Advanced solid<br>tumors                                       |        | 1   | Recruiting                | NCT04648202                 |              |
| Cinrebafusp alfa<br>(PRS-343)   | HER2 x<br>CD137 BsAb                         | HER2+ advanced<br>solid tumors                                 |        | 1   | Completed                 | NCT03330561                 | 12%<br>[10]  |

|                                              |                                                   |                                                              |                |     |                        |             |                 |
|----------------------------------------------|---------------------------------------------------|--------------------------------------------------------------|----------------|-----|------------------------|-------------|-----------------|
| Cinrebafusp alfa (PRS-343) + atezolizumab    | HER2 x CD137 BsAb + anti-PDL1                     | HER2+ advanced solid tumors                                  |                | 1b  | Unknown                | NCT03650348 |                 |
| YH32367                                      | HER2 x C137                                       | HER2+ advanced solid tumors, breast + gastric dose expansion |                | 1/2 | Recruiting             | NCT05523947 |                 |
| M802                                         | HER2 x CD3                                        | HER2+ advanced solid tumors                                  |                | 1   | Not yet recruiting     | NCT04501770 |                 |
| KM257                                        | HER2 x HER2 BsAb                                  | HER2+ advanced solid tumors                                  |                | 1   | Not yet recruiting     | NCT05320874 |                 |
| TQB2930                                      | HER2 x HER2 BsAb                                  | Advanced solid tumors prioritizing HER2+                     |                | 1   | Recruiting             | NCT05380882 |                 |
| MBS301                                       | HER2 x HER2 BsAb                                  | HER2+ advanced solid tumors                                  |                | 1   | Recruiting             | NCT03842085 |                 |
| IBI315                                       | PD-1 x HER2 BsAb                                  | HER2+ advanced solid tumors                                  |                | 1   | Completed              | NCT04162327 |                 |
| IMM2902                                      | HER2 x CD47 BsAb                                  | HER2+ advanced solid tumors                                  |                | 1   | Recruiting             | NCT05076591 |                 |
| KN026 + KN046                                | HER2 x HER2 BsAb + PDL1 x CTLA4 BsAb              | HER2+ advanced solid tumors                                  |                | 1   | Active, not recruiting | NCT04040699 | 57.1% [11]      |
| SI-B001                                      | EGFR x HER3 BsAb                                  | Advanced epithelial tumors                                   |                | 1   | Recruiting             | NCT04603287 |                 |
| BNA035                                       | EGFR x CD137 BsAb                                 | Advanced solid tumors                                        |                | 1   | Recruiting             | NCT05150457 |                 |
| HLX35                                        | EGFR x CD137 BsAb                                 | Advanced solid tumors                                        |                | 1   | Active, not recruiting | NCT05360381 |                 |
| HLX35 + HLX10                                | EGFR x CD137 BsAb + anti-PD1                      | Advanced solid tumors                                        |                | 1   | Not yet recruiting     | NCT05442996 |                 |
| MCLA-129                                     | EGFR x c-MET BsAb                                 | Advanced solid tumors                                        |                | 1/2 | Recruiting             | NCT04930432 |                 |
| EMB-01                                       | EGFR x c-MET BsAb                                 | Advanced solid tumors, NSCLC dose expansion                  |                | 1/2 | Recruiting             | NCT03797391 | 5.3% [12]       |
| REGN7075 + cemiplimab                        | EGFR x CD28 BsAb + anti-PD1                       | Advanced solid tumors                                        | COMBINE-EGFR-1 | 1/2 | Recruiting             | NCT04626635 |                 |
| BCA101 +/- pembrolizumab                     | EGFR x TGF- $\beta$ BsAb +/- anti-PD1             | EGFR-driven advanced solid tumors                            |                | 1   | Recruiting             | NCT04429542 | 27-58% [13, 14] |
| M1231                                        | EGFR x mucin-1 BsAb                               | Advanced solid tumors                                        |                | 1   | Completed              | NCT04695847 |                 |
| TJ033721                                     | CD137 x claudin 18.2 BsAb                         | Advanced solid tumors                                        |                | 1   | Recruiting             | NCT04900818 |                 |
| PM1009                                       | TIGIT x PVRIG BsAb                                | Advanced solid tumors                                        |                | 1   | Recruiting             | NCT05607563 |                 |
| GI-101 +/- pembrolizumab or lenvatinib or RT | CD80 x IL2R BsAb +/- anti-PD1 or TKI or radiation | Advanced solid tumors                                        | KEYNOTE-B59    | 1/2 | Recruiting             | NCT04977453 | 12% [15]        |
| ATOR-1015                                    | CTLA-4 x OX-40 BsAb                               | Advanced solid tumors                                        |                | 1   | Completed              | NCT03782467 |                 |

|                                      |                                   |                                        |  |     |            |             |      |
|--------------------------------------|-----------------------------------|----------------------------------------|--|-----|------------|-------------|------|
| EMB-09                               | PD-L1 x OX-40                     | Advanced solid tumors                  |  | 1   | Recruiting | NCT05263180 |      |
| GEN1044 (DuoBody®-CD3x5T4)           | CD3 x 5T4 BsAb                    | Advanced solid tumors                  |  | 1/2 | Terminated | NCT04424641 | 2.7% |
| Orlotamab (MGD009)                   | CD3 x B7-H3 BsAb                  | B7-H3 expressing advanced solid tumors |  | 1   | Terminated | NCT02628535 |      |
| Obrindatamab (MGD009) + retifanlimab | CD3 x B7-H3 BsAb + anti-PD1       | B7-H3 expressing advanced solid tumors |  | 1   | Completed  | NCT03406949 |      |
| EMB-07                               | CD3 x ROR1 BsAb                   | Advanced solid tumors                  |  | 1   | Recruiting | NCT05607498 |      |
| ERY974                               | CD3 x glypican3 BsAb              | GPC3+ Advanced solid tumors            |  | 1   | Completed  | NCT02748837 |      |
| JCJ-78306358                         | CD3 x HLA-G tumor Ab BsAb         | Advanced solid tumors                  |  | 1   | Completed  | NCT04991740 |      |
| GEM3PSCA                             | PSCA targeted T cell engager BsAb | Metastatic UC, RCC, prostate or NSCLC  |  | 1   | Terminated | NCT03927573 |      |

| <b>Supplemental Table S2. Clinical trials of cellular therapies in advanced solid tumors including metastatic urothelial carcinoma.</b> |                                                                       |               |                                                                                               |              |                                |                   |
|-----------------------------------------------------------------------------------------------------------------------------------------|-----------------------------------------------------------------------|---------------|-----------------------------------------------------------------------------------------------|--------------|--------------------------------|-------------------|
| <b>Regimen</b>                                                                                                                          | <b>Drug Classes</b>                                                   | <b>Target</b> | <b>Disease / Patients</b>                                                                     | <b>Phase</b> | <b>Status<br/>(March 2023)</b> | <b>Identifier</b> |
| HBI 0201-ESO TCRT                                                                                                                       | TCR gene engineered lymphocytes                                       | NY-ESO-1      | NY-ESO-1 expressing metastatic cancers                                                        | 1/2          | Recruiting                     | NCT05296564       |
| TAEST16001                                                                                                                              | TCR gene engineered lymphocytes                                       | NY-ESO-1      | Advanced solid tumors (not NSCLC) with HLA-A*0201 and ≥25% NY-ESO-1 cells by IHC              | 1            | Completed                      | NCT03159585       |
| FH-MagIc TCR-T cells + atezolizumab                                                                                                     | TCR gene engineered lymphocytes + anti-PDL1                           | MAGE-A1       | Metastatic MAGE-A1 expressing UC, TNBC or NSCLC. HLA-A*02:01.                                 | 1/2          | Terminated (slow accrual)      | NCT04639245       |
| Anti-MAGE-A3 LHA-A*01 Restricted TCR-gene engineered lymphocytes                                                                        | TCR gene engineered lymphocytes                                       | MAGE-A3       | Metastatic MAGE-A3 expressing UC, RCC, melanoma, cervical cancer, or breast cancer. HLA-A*01. | 1/2          | Terminated (slow accrual)      | NCT02153905       |
| CCT301-59                                                                                                                               | CAR-T cells                                                           | ROR2          | ROR2 positive advanced solid tumors                                                           | 1            | Active, not recruiting         | NCT03960060       |
| Irradiated allogeneic donor lymphocyte infusion                                                                                         | Allogeneic donor lymphocytes                                          |               | Advanced solid and hematologic malignancies. HLA partially matched related donors.            | 1            | Completed                      | NCT00161187       |
| SNK01 +/- trastuzumab or cetuximab                                                                                                      | Autologous NK cells +/- anti-HER2 or anti-EGFR                        |               | HER2 or EGFR expressing advanced cancers                                                      | 1/2          | Withdrawn                      | NCT04464967       |
| HER2 specific CAR-T cells + intratumoral CAdVEC                                                                                         | HER2- specific autologous CAR VST + intratumoral oncolytic adenovirus | HER2          | HER2 positive advanced solid tumors                                                           | 1            | Recruiting                     | NCT03740256       |

| <b>Supplemental Table S3. Clinical trials of vaccines and oncolytic viruses in advanced solid tumors including metastatic urothelial carcinoma.</b> |                                                                                     |               |                                                              |              |                                |                   |
|-----------------------------------------------------------------------------------------------------------------------------------------------------|-------------------------------------------------------------------------------------|---------------|--------------------------------------------------------------|--------------|--------------------------------|-------------------|
| <b>Regimen</b>                                                                                                                                      | <b>Drug Classes</b>                                                                 | <b>Target</b> | <b>Disease / Patients</b>                                    | <b>Phase</b> | <b>Status (March 2023)</b>     | <b>Identifier</b> |
| DC205-NY-ESO-1 +/- sirolimus                                                                                                                        | Intranodal dendritic cell vaccine +/- mTOR inhibitor                                | NY-ESO-1      | NY-ESO-1 positive advanced solid tumors                      | 1            | Completed                      | NCT01522820       |
| Personalized tumor neoantigen peptide vaccine + pembrolizumab                                                                                       | Personalized tumor neoantigen vaccine + anti-PD1                                    |               | Advanced solid tumors                                        | 1            | Recruiting                     | NCT05269381       |
| DSP-7888 + ICI                                                                                                                                      | WT1 immunotherapeutic peptide vaccine + anti-PD1                                    | WT1           | Advanced solid tumors                                        | 1b/2         | Completed                      | NCT03311334       |
| ADXS-NEO +/- pembrolizumab                                                                                                                          | Listeria monocytogenes-based patient-specific tumor neoantigen vaccine +/- anti-PD1 |               | Advanced solid tumors                                        | 1            | Terminated                     | NCT03265080       |
| CDX-1307                                                                                                                                            | hCG- $\beta$ dendritic cell targeted vaccine                                        |               | Advanced solid tumors                                        | 1            | Completed                      | NCT00648102       |
| CAdVEC + HER2 specific CAR-T cells                                                                                                                  | Oncolytic adenovirus + HER2 autologous CAR-T                                        | HER2          | Advanced solid tumors expressing HER2                        | 1            | Recruiting                     | NCT03740256       |
| Enadenotucirev                                                                                                                                      | Oncolytic chimeric adenovirus                                                       |               | Advanced solid epithelial tumors, metastatic colorectal, mUC | 1/2          | Completed                      | NCT02028442       |
| CVA21 +/- pembrolizumab                                                                                                                             | Coxsackievirus A21 (V937) +/- anti-PD1                                              | ICAM-1, DAF   | NSCLC, mUC, CRPC, melanoma                                   | 1            | Completed                      | NCT02043665       |
| PF-07263689 (WO-12) +/- sasanlimab                                                                                                                  | Oncolytic vaccinia virus +/- anti-PD1                                               |               | Advanced solid tumors                                        | 1            | Terminated (business decision) | NCT05061537       |
| YSCH-01                                                                                                                                             | Recombinant L-IFN expressing oncolytic adenovirus                                   |               | Advanced solid tumors                                        | 1            | Recruiting                     | NCT05180851       |

## Supplement References

1. Day, D., et al., *1028P Preliminary phase I results from a first-in-human study of EMB-02, a PD-1xLAG-3 bispecific antibody, in patients (pts) with advanced solid tumors*. Annals of Oncology, 2023. **34**: p. S625.
2. Coward, J., et al., *Safety and efficacy of AK112, an anti-PD-1/VEGF-A bispecific antibody, in patients with advanced solid tumors in a phase I dose escalation study*. Journal of Clinical Oncology, 2021. **39**(15\_suppl): p. 2515-2515.
3. Shum, E., et al., *523 Preliminary clinical experience with XmAb20717, a PD-1 x CTLA-4 bispecific antibody, in patients with advanced solid tumors*. Journal for ImmunoTherapy of Cancer, 2021. **9**(Suppl 2): p. A553-A553.
4. Tolcher, A.W., et al., *A phase 1, first-in-human, open-label, dose escalation and dose expansion study of TST005 in patients with locally advanced or metastatic solid tumors*. Journal of Clinical Oncology, 2023. **41**(16\_suppl): p. 2531-2531.
5. Yap, T.A., et al., *A Phase 1 First-in-Human Study of FS118, a Tetravalent Bispecific Antibody Targeting LAG-3 and PD-L1 in Patients with Advanced Cancer and PD-L1 Resistance*. Clin Cancer Res, 2023. **29**(5): p. 888-898.
6. Wang, Y., et al., *SI-B003 (PD-1/CTLA-4) in patients with advanced solid tumors: A phase I study*. Journal of Clinical Oncology, 2023. **41**(16\_suppl): p. e14668-e14668.
7. Akce, M., et al., *A phase 1 multiple-ascending dose study to evaluate the safety and tolerability of XmAb23104 (PD-1 x ICOS) in subjects with selected advanced solid tumors (DUET-3)*. Journal of Clinical Oncology, 2022. **40**(16\_suppl): p. 2604-2604.
8. Sanborn, R.E., et al., *A phase 1 dose-escalation study of a PD-L1xCD27 bispecific antibody CDX-527 in patients with advanced malignancies*. Journal of Clinical Oncology, 2021. **39**(15\_suppl): p. 2585-2585.
9. Wang, J., et al., *Abstract CT513: Phase I study of IBI322 (anti-CD47/PD-L1 bispecific antibody) monotherapy therapy in patients with advanced solid tumors in China*. Cancer Research, 2022. **82**(12\_Supplement): p. CT513-CT513.
10. Ku, G., et al., *525O A phase I dose escalation study of PRS-343, a HER2/4-1BB bispecific molecule, in patients with HER2-positive malignancies*. Annals of Oncology, 2020. **31**: p. S462-S463.
11. Gong, J., et al., *339 Preliminary safety, tolerability and efficacy results of KN026 (a HER2-targeted Bispecific Antibody) in combination with KN046 (an anti-PD-L1/CTLA-4 Bispecific Antibody) in patients (pts) with HER2 aberrated solid tumors*. Journal for ImmunoTherapy of Cancer, 2020. **8**(Suppl 3): p. A207-A207.
12. Qing, Z., et al., *22P EMB-01: An EGFR-cMET bispecific antibody, in advanced/metastatic solid tumors phase I results*. Annals of Oncology, 2022. **33**: p. S39-S40.
13. Bedard, P.L., et al., *A phase 1 trial of the bifunctional EGFR/TGF $\beta$  fusion protein BCA101 alone and in combination with pembrolizumab in patients with advanced solid tumors*. Journal of Clinical Oncology, 2022. **40**(16\_suppl): p. 2513-2513.
14. Hanna, G.J., et al., *Dose expansion results of the bifunctional EGFR/TGF $\beta$  inhibitor BCA101 with pembrolizumab in patients with recurrent, metastatic head and neck squamous cell carcinoma*. Journal of Clinical Oncology, 2023. **41**(16\_suppl): p. 6005-6005.
15. Cho, B.C., et al., *718 Preliminary results of GII-101-P101 (Keynote-B59): GI-101 (CD80-IgG4 Fc-IL2v) as a single agent and in combination with pembrolizumab in patients with advanced and/or metastatic solid tumors*. Journal for ImmunoTherapy of Cancer, 2022. **10**(Suppl 2): p. A751-A751.
